# Supplementary material
Source: bioRxiv or medRxiv preprint supplement (http://medrxiv.stage.highwire.org/highwire/filestream/84573/field_highwire_adjunct_files/4/2020.06.04.20121855-5.pdf)
Supplement: Supplementary file [file 2020.06.04.20121855-5.pdf]

### Supplementary Material 3. Computation of the Alternative Healthy Eating Index (AHEI)-2010

The AHEI-2010 score has been published previously [1].

The computation in the NutriNet-Santé cohort included 10 out of 11 original components as the intake of trans fatty acids was not available. Each component ranges from 0 to 10. Criteria for minimum and maximum scores are shown in the table below. Intermediate scores are attributed proportionally to the intake (see an example for the vegetable component in footnote 1)

| Component                                                           | Criteria for minimum score (0) | Criteria for maximum score (10) |
|---------------------------------------------------------------------|--------------------------------|---------------------------------|
| Vegetables <sup>1</sup> , servings/d                                | 0                              | ≥ 5                             |
| Fruit <sup>2</sup> , servings/d                                     | 0                              | ≥ 4                             |
| Whole grains, g/d                                                   | 0                              | Women: 75<br>Men: 90            |
| Sugar-sweetened beverages and fruit juice <sup>3</sup> , servings/d | ≥ 1                            | 0                               |
| Nuts and legumes <sup>4</sup> , servings/d                          | 0                              | ≥ 1                             |
| Red or processed meat <sup>5</sup> , servings/d                     | ≥ 1.5                          | 0                               |
| Long-chain (n-3) PUFA (EPA + DHA), mg/d                             | 0                              | 250                             |
| PUFA, % of energy                                                   | ≤ 2                            | ≥ 10                            |
| Sodium <sup>6</sup> , mg/d                                          | Highest decile                 | Lowest decile                   |
| Alcohol <sup>7</sup> , drinks/d                                     | Women: ≥ 2.5<br>Men: ≥ 3.5     | Women: 0.5-1.5<br>Men: 0.5-2.0  |
| <b>Total</b>                                                        | <b>0</b>                       | <b>100</b>                      |

<sup>1</sup> Potatoes and tubers are not included in the vegetable component; 1 serving = 118.3 g. Intermediate scores for vegetable intakes are calculated as follows: score = vegetable intake (g/d)\*10/(5\*118.3). An intake of 300 g will therefore translate to a score of 5.1 for the vegetable component

<sup>2</sup> Fruit juice are not included in the fruit component; 1 serving = 118.3 g.

<sup>3</sup> 100%-fruit juices are included in the sugar-sweetened beverages and fruit juice component; 1 serving is 226.8 g

<sup>4</sup> 1 serving = 28.35 g

<sup>5</sup> 1 serving of red meat is 113.4g and 1 serving of processed meat is 42.5g

<sup>6</sup> Sex-specific cut-offs were computed for deciles

<sup>7</sup> 1 drink of alcohol contains 10 g of ethanol

### REFERENCE

- 1 Chiuve SE, Fung TT, Rimm EB, *et al.* Alternative Dietary Indices Both Strongly Predict Risk of Chronic Disease. *The Journal of Nutrition* 2012;**142**:1009–18. doi:10.3945/jn.111.157222
